# Supplementary material
Source: MDPI journal article supplement (https://www.mdpi.com/1996-1073/12/6/1060)
Supplement: s1 [file s1]

# Supplementary Materials

## (Detailed description of the numerical analysis model)

### 1. Shear-stress transport (SST) k- $\omega$ model

In the shear-stress transport (SST) k- $\omega$  model to predict the flow of rim seal is as follows, the turbulent kinetic energy  $k$  and the specific rate of dissipation  $\omega$  are calculated using the following transport equation.

$$\frac{\partial}{\partial t}(\rho k) + \frac{\partial}{\partial x_i}(\rho k u_i) = \frac{\partial}{\partial x_j} \left( \Gamma_k \frac{\partial k}{\partial x_j} \right) + G_k - Y_k + S_k$$
$$\frac{\partial}{\partial t}(\rho \omega) + \frac{\partial}{\partial x_j}(\rho \omega u_j) = \frac{\partial}{\partial x_j} \left( \Gamma_\omega \frac{\partial \omega}{\partial x_j} \right) + G_\omega - Y_\omega + D_\omega + S_\omega$$

$G_k$  : the production of turbulence kinetic energy.

$G_\omega$  : the generation of  $\omega$ ,  $G_\omega = \alpha \frac{\omega}{k} G_k$

$\Gamma_k$  and  $\Gamma_\omega$  : the effective diffusivity of  $k$  and  $\omega$ .

$Y_k$  and  $Y_\omega$  : the dissipation of  $k$  and  $\omega$  due to turbulence.

$D_\omega$  : the cross-diffusion term.

$S_k$  and  $S_\omega$ : user-defined source terms.

### 2. Species transport model

The local mass fraction of each species,  $Y_i$ , is predicted through the solution of a convection-diffusion for the  $i^{\text{th}}$ , species. This conservation equation takes the following general form.

$$\frac{\partial}{\partial t}(\rho Y_i) + \nabla \cdot (\rho \vec{V} Y_i) = -\nabla \cdot \vec{J}_i + R_i + S_i$$

$R_i$  : the net rate of production of species  $i$  by chemical reaction.

$S_i$  : the rate of creation by addition from the dispersed phase plus any user-defined sources.

$\vec{J}_i$ : the diffusion flux of species  $i$ , which arises due to gradients of concentration and temperature.

The mass diffusion in turbulent flows is as follows.

$$\vec{J}_i = - \left( \rho D_{i,m} + \frac{\mu_t}{Sc_t} \right) \nabla Y_i - D_{T,i} \frac{\nabla T}{T}$$

$D_{i,m}$  : the mass diffusion coefficient for species  $i$  in the mixture.

$D_{T,i}$  : the thermal (Soret) diffusion coefficient.

$Sc_t$  : the turbulent Schmidt number.  $Sc_t = \frac{\mu_t}{\rho D_t}$ , where  $\mu_t$  is the turbulent viscosity and  $D_t$  is the turbulent diffusivity.

## Reference

1. ANSYS Fluent. 15.0 Theory Guide.
